# Supplementary material for: Label-free quantitative proteomics to investigate the response of strawberry fruit after controlled ozone treatment
Source: Royal Society of Chemistry journal article supplement (doi:10.1039/c8ra08405j), 2019-01-01
Supplement: c8ra08405j1.pdf [file c8ra08405j1.pdf]

Supplementary table 1. Primers of quantitative RT-PCR for the selected genes

| Rrotein ID       | Primer F (5'-3')                             | Primer R (5'-3')                               |
|------------------|----------------------------------------------|------------------------------------------------|
| DN13670_c0_g1_i1 | ATGGCGGGTATAACCAGCTC                         | CAATTGGGCCAGAAGATGCT                           |
| DN32133_c0_g1_i1 | CATTGGCTTCAGCAGCACCT                         | CCAAATGCCTTTCCAAACTTC<br>CTTTGAATCCACAAGCCAAAT |
| DN33265_c0_g4_i1 | GTGCTGGAGAGGCTGGAAC                          | C                                              |
| DN33354_c0_g1_i1 | GGCTGATCGGAGAGTGGAGA                         | TGAAAGCGCATCTTCAAAATC                          |
| DN33938_c0_g1_i3 | ACGAGGCTGTATCCGCTGAC                         | CGTTGCTGTTGAGGCAGTTG                           |
| DN35749_c0_g2_i4 | GGAGTGGCCATACAAGTGTGC                        | GCTGCATAGGCCTTGTCTT                            |
| DN35844_c0_g5_i2 | TGTGCTGAGGCTGAGAAGGTC                        | GAACCGCTGAGGATGCAAT                            |
| DN36541_c0_g1_i1 | GATGGATCCGCTTCTGCAAT                         | CCATCATCCGCATACTGTCTG                          |
| DN36953_c0_g2_i1 | GGGGTGTGGTCAAAGCCTAC                         | TCCGTGCGACATATTCATCC                           |
| DN37718_c0_g2_i3 | GCCTTCTACCGCTGTGACATT                        | TGCAGCATTGCCAAAGATGA                           |
| DN38314_c1_g3_i4 | TTTCCAAAAGGCGTGAATGT                         | TTTCCAAAAGGCGTGAATGT                           |
| DN38542_c1_g6_i1 | CCTTGGTCGCCAAGTCTGA                          | GTAAGGGGCGGAGAAGAGGA                           |
| DN38781_c0_g2_i1 | TGACGAGAGGACCGGTAAGC<br>GAGGCCATGATACCTCGAAG | GCGCCGTGTTAGATAACC<br>CACGGCGTCTAACTTCCTCA     |
| DN39221_c0_g1_i3 | A                                            |                                                |
| DN39915_c0_g1_i3 | GGTGAACCTGAGCGCGATTA                         | GACCGGGGTACATTGATACCA                          |
| DN40398_c1_g3_i1 | TCTTGGCAGCCTTCCGAGT                          | ACTGGTAAGCCCGTCAGTCC                           |
| DN40671_c0_g1_i8 | GAAAGGGCCACCTTCATCTC                         | TTTTCATCCGAGGCAATGGT                           |
| DN41597_c1_g1_i1 | CTGAAGCAGCGAAACAGGTC                         | CTCTCGCCAGTACTCACCGT                           |
| DN41597_c1_g1_i8 | TACATGGCGACGACGACAGT                         | GCAAGTTCCCCAGTTGTTTCT                          |
| DN46943_c0_g1_i1 | CTCCTGCCGTGAAGGAATCT                         | AAGGCGTTATGGTGGTCTCC                           |

**Supplemental Table** – Differentially expressed proteins of the strawberry proteome after 7 days of storage in Blank, 2.144 mg/m<sup>3</sup>, 6.432 mg/m<sup>3</sup> and 10.72 mg/m<sup>3</sup>.

| Protein name                                            | Organism                     | Accession number <sup>a</sup> | Mass/pI <sup>b</sup> | Mascot score <sup>c</sup> | Matched peptides number | Sequence coverage (%) | Protein relative abundance <sup>d</sup>                                               |
|---------------------------------------------------------|------------------------------|-------------------------------|----------------------|---------------------------|-------------------------|-----------------------|---------------------------------------------------------------------------------------|
| Ribulose biphosphate carboxylase large chain            | Trigonobalanus doichangensis | DN40398_c1_g3_i1              | 37.20/7.97           | 1557                      | 10                      | 29.94                 | 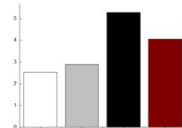   |
| Glucose-1-phosphate adenylyltransferase                 | Fragaria ananassa            | DN33938_c0_g1_i3              | 57.24/7.42           | 175                       | 10                      | 21.75                 |    |
| Pyruvate kinase                                         | Prunus persica               | DN36953_c0_g2_i1              | 70.53/8.43           | 828                       | 18                      | 39.59                 |    |
| Nicotinate-nucleotide pyrophosphorylase [carboxylating] | Vitis vinifera               | DN38516_c1_g1_i3              | 31.06/6.24           | 156                       | 4                       | 15.95                 |   |
| 3-dehydroquinate synthase, chloroplastic                | Actinidia chinensis          | DN39504_c0_g2_i1              | 31.06/5.63           | 147                       | 7                       | 36.49                 |  |

|                                                |                                           |                  |            |      |    |       |                                                                                       |
|------------------------------------------------|-------------------------------------------|------------------|------------|------|----|-------|---------------------------------------------------------------------------------------|
| Acyl-[acyl-carrier-protein] desaturase         | <i>Prunus persica</i>                     | DN40671_c0_g1_i8 | 31.06/5.72 | 2277 | 23 | 58.28 | 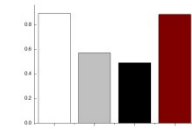   |
| ATP synthase subunit alpha, chloroplastic      | <i>Fragaria vesca</i> subsp. <i>vesca</i> | DN38314_c1_g3_i4 | 31.06/5.06 | 873  | 14 | 30.57 |    |
| Chlorophyll a-b binding protein, chloroplastic | <i>Kalanchoe fedtschenkoi</i>             | DN37339_c1_g1_i1 | 31.06/5.26 | 287  | 4  | 11.61 |    |
| D-3-phosphoglycerate dehydrogenase             | <i>Prunus persica</i>                     | DN38712_c1_g3_i2 | 31.06/7.15 | 1988 | 19 | 32.34 |    |
| Alpha-1,4 glucan phosphorylase                 | <i>Cajanus cajan</i>                      | DN36541_c0_g1_i1 | 31.06/6.34 | 391  | 10 | 26.79 |   |
| Carbamoyl-phosphate synthase large chain       | <i>Morus notabilis</i>                    | DN41489_c0_g5_i2 | 31.06/6.37 | 182  | 8  | 25.79 |  |

|                                     |                   |                  |            |      |    |       |                                                                                       |
|-------------------------------------|-------------------|------------------|------------|------|----|-------|---------------------------------------------------------------------------------------|
| ATP-dependent 6-phosphofruktokinase | Prunus persica    | DN39221_c0_g1_i3 | 31.06/6.62 | 899  | 17 | 40.66 | 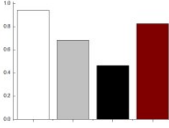   |
| Pyruvate kinase                     | Prunus persica    | DN36953_c0_g2_i1 | 31.06/8.43 | 828  | 18 | 39.59 |    |
| Pyruvate kinase                     | Prunus persica    | DN35844_c0_g5_i2 | 31.06/9.17 | 1272 | 11 | 53.15 |    |
| Pyruvate kinase                     | Fragaria ananassa | DN36176_c0_g1_i1 | 31.06/7.93 | 1066 | 12 | 62.37 |    |
| Phosphotransferase                  | Prunus persica    | DN40359_c1_g9_i1 | 31.06/6.25 | 693  | 8  | 39.26 |   |
| Malate synthase                     | Prunus sibirica   | DN33354_c0_g1_i1 | 31.06/7.9  | 337  | 18 | 35.81 |  |

|                                                                         |                            |                  |            |      |    |       |                                                                                       |
|-------------------------------------------------------------------------|----------------------------|------------------|------------|------|----|-------|---------------------------------------------------------------------------------------|
| Citrate synthase                                                        | <i>Prunus persica</i>      | DN38781_c0_g2_i1 | 31.06/9.23 | 255  | 13 | 25.42 | 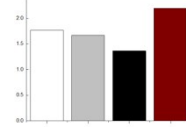   |
| Malic enzyme                                                            | <i>Malus domestica</i>     | DN33265_c0_g4_i1 | 31.06/6.28 | 1300 | 18 | 35.71 |    |
| Succinate dehydrogenase [ubiquinone] iron-sulfur subunit, mitochondrial | <i>Gossypium raimondii</i> | DN46943_c0_g1_i1 | 31.06/8.79 | 112  | 4  | 10.91 |    |
| Malic enzyme                                                            | <i>Citrus sinensis</i>     | DN41132_c1_g2_i4 | 31.06/5.5  | 2739 | 15 | 48.90 |    |
| Pantothenate kinase 2                                                   | <i>Morus notabilis</i>     | DN39070_c0_g2_i7 | 31.06/7.2  | 903  | 10 | 62.68 |   |
| UDP-glucuronosyl/UDP-glucosyltransferase                                | <i>Corchorus olitorius</i> | DN35749_c0_g2_i4 | 31.06/4.97 | 83   | 2  | 17.73 |  |

|                                                 |                         |                       |             |      |    |       |                                                                                       |
|-------------------------------------------------|-------------------------|-----------------------|-------------|------|----|-------|---------------------------------------------------------------------------------------|
| UTP--glucose-1-phosphate<br>uridylyltransferase | <i>Pyrus pyrifolia</i>  | DN39915_c0<br>_g1_i3  | 31.06/8.91  | 2992 | 16 | 74.34 | 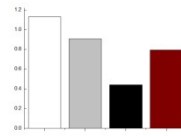   |
| Cinnamyl-alcohol dehydrogenase isoform 3        | <i>Theobroma cacao</i>  | DN32133_c0<br>_g1_i1  | 38.15/7.05  | 632  | 15 | 51.98 |    |
| 4-hydroxyphenylpyruvate dioxygenase             | <i>Prunus persica</i>   | DN38542_c1<br>_g11_i3 | 29.84/5.01  | 403  | 5  | 27.88 |    |
| 4-hydroxyphenylpyruvate dioxygenase             | <i>Prunus persica</i>   | DN38542_c1<br>_g6_i1  | 13.40/7.21  | 261  | 3  | 50.78 |    |
| Cytochrome P450                                 | <i>Morus notabilis</i>  | DN41597_c1<br>_g1_i1  | 49.88/6.42  | 298  | 10 | 25.05 |   |
| Cytochrome P450, putative                       | <i>Ricinus communis</i> | DN41597_c1<br>_g1_i8  | 33.10/10.35 | 305  | 4  | 11.11 |  |

|                                            |                      |                   |             |      |    |       |                                                                                     |
|--------------------------------------------|----------------------|-------------------|-------------|------|----|-------|-------------------------------------------------------------------------------------|
| CAMTA domain class transcription factor    | Malus domestica      | DN37953_c0_g10_i2 | 52.57/7.23  | 50   | 3  | 9.27  | 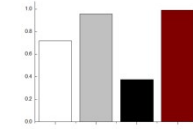 |
| Endoglucanase                              | Hevea brasiliensis   | DN13670_c0_g1_i1  | 23.45/9.38  | 117  | 3  | 18.80 |  |
| Pectinesterase                             | Prunus persica       | DN37718_c0_g2_i3  | 30.971/9.11 | 1855 | 12 | 47.20 |  |
| Reversibly glycosylated polypeptide family | Corchorus capsularis | DN38934_c0_g5_i4  | 40.706/5.96 | 1749 | 22 | 72.54 |  |

<sup>a</sup> Accession numbers according to the detected transcriptome of the strawberry transcriptomic database.

<sup>b</sup> Experimental mass (kDa) and isoelectric point (pI) of identified proteins.

<sup>c</sup> Mascot score reported after searching against the detected transcriptome of the strawberry transcriptomic database.

<sup>d</sup> Relative abundances of normalized protein expression; values are expressed as the mean of three replications. White, grey, black and wine bars show Blank, 2.144 mg/m<sup>3</sup>, 6.432 mg/m<sup>3</sup> and 10.72 mg/m<sup>3</sup> ozone treatment storage, respectively.
